# Supplementary material for: Unsaturated phospholipid modified FeOCl nanosheets for enhancing tumor ferroptosis
Source: Royal Society of Chemistry journal article supplement (doi:10.1039/d2tb01854c), 2023-01-01
Supplement: d2tb01854c1.pdf [file d2tb01854c1.pdf]

## Supporting Information

# Unsaturated phospholipid modified FeOCl nanosheets for enhancing tumor ferroptosis

Zi He<sup>†</sup>, Yijun Guo<sup>†</sup>, Jinzhu Chen, Huiling Luo, Xinxin Liu, Xiuming Zhang, Yanan Sun, Dongtao Ge\*, Shefang Ye\* and Wei Shi\*

The Higher Educational Key Laboratory for Biomedical Engineering of Fujian Province/Research Center of Biomedical Engineering of Xiamen, Fujian Key Laboratory of Surface and Interface Engineering for High Performance Materials, Department of Biomaterials, College of Materials, Xiamen University, Xiamen, 361005, China

<sup>†</sup>Zi He and Yijun Guo contributed equally to this work.

\*Correspondence: [gedt@xmu.edu.cn](mailto:gedt@xmu.edu.cn), [yeshefang@xmu.edu.cn](mailto:yeshefang@xmu.edu.cn), [shiwei@xmu.edu.cn](mailto:shiwei@xmu.edu.cn)

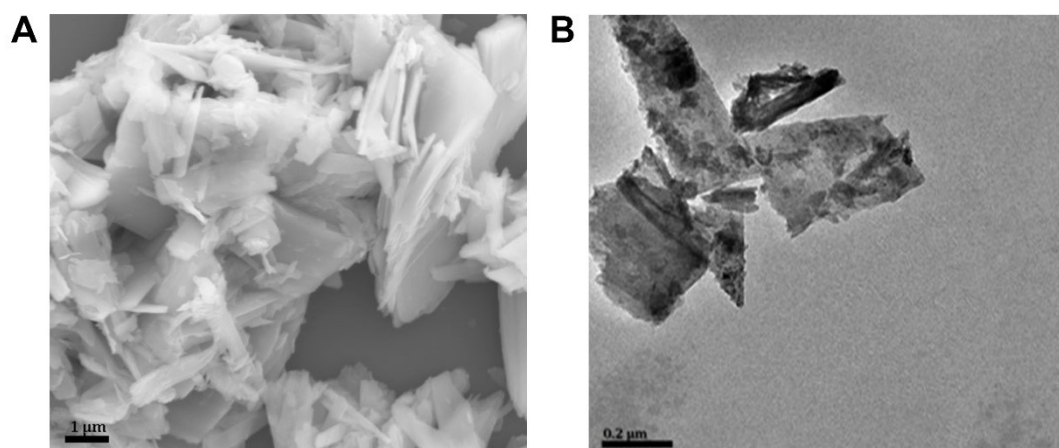

**Fig. S1** (A) SEM images of FeOCl plate. (B) TEM images of FeOCl plate.

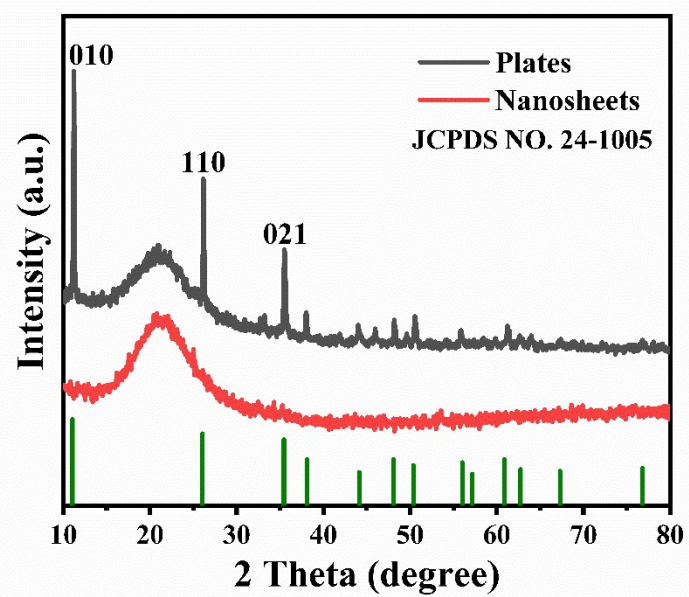

Fig. S2 XRD pattern of FeOCl before and after exfoliation.

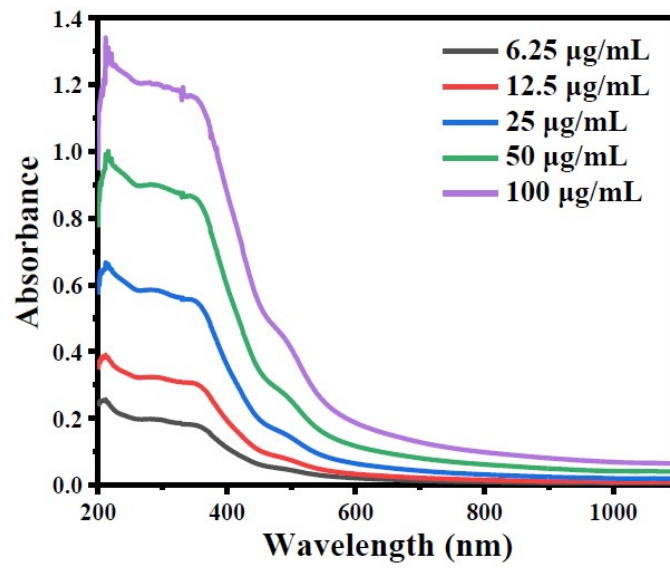

**Fig. S3** The absorption spectra of different concentrations of FeOCl after exfoliation.

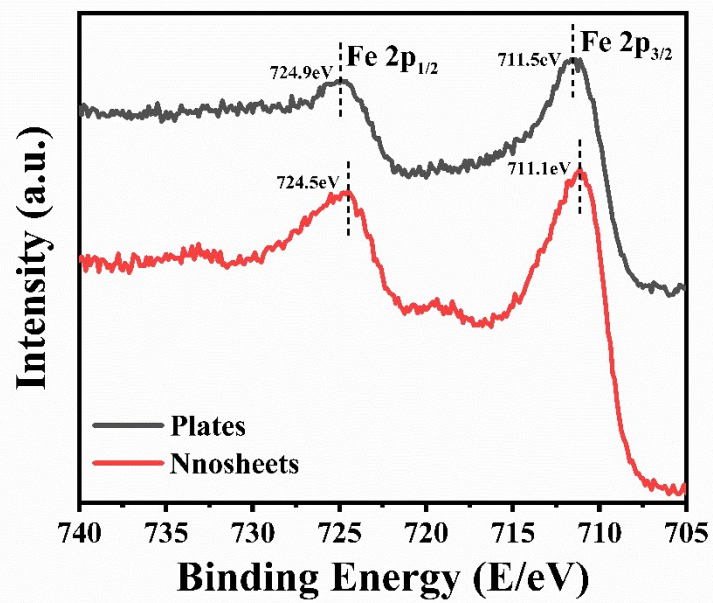

Fig. S4 XPS spectrum of FeOC1 before and after exfoliation.

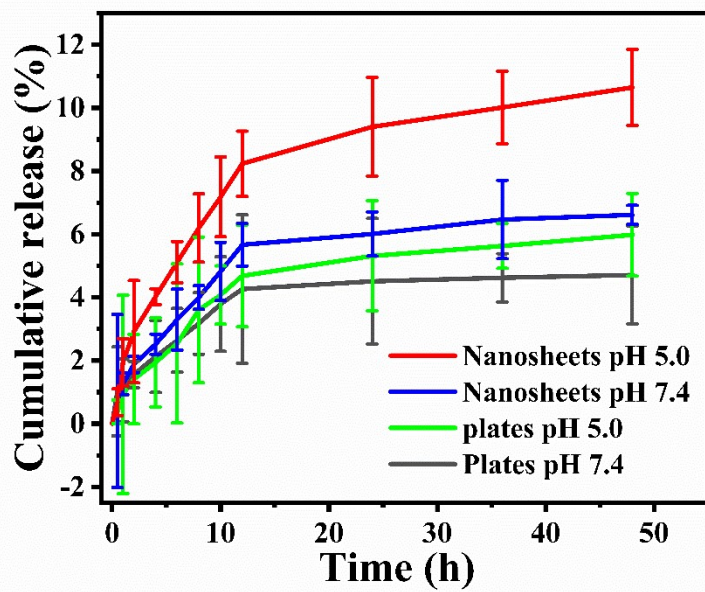

**Fig. S5** The release curves of iron in different pH from FeOCl before and after exfoliation.

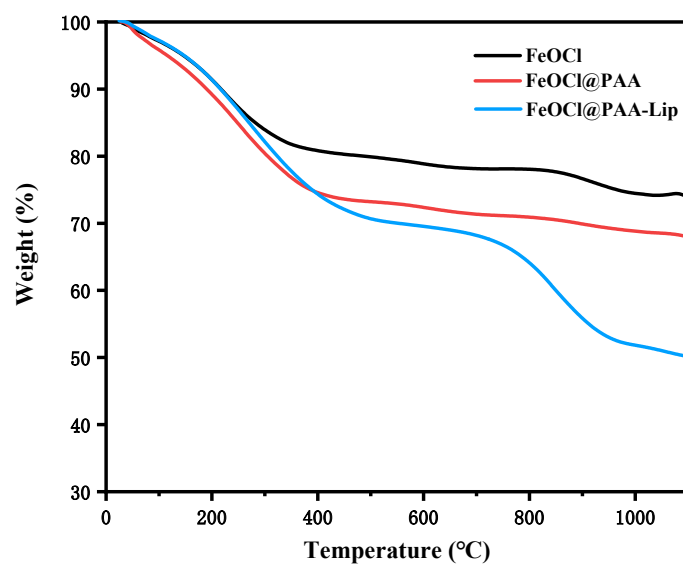

**Fig. S6** TGA curves of functionalized nanosheets.

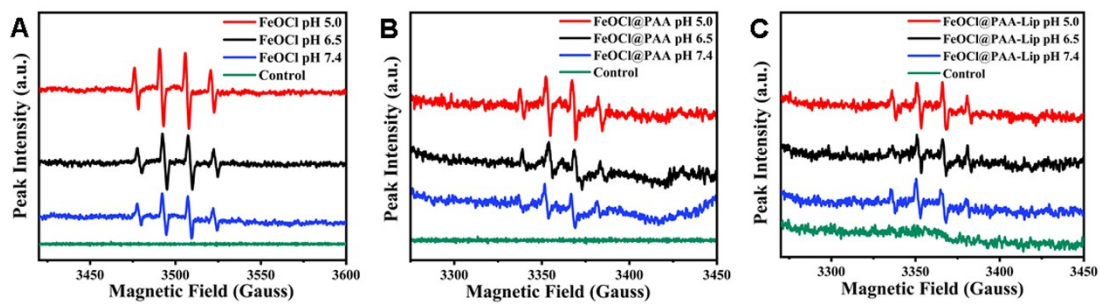

**Fig. S7** The ESR spectra of FeOCl, FeOCl@PAA and FeOCl@PAA-Lip at pH 7.4, pH 6.5 and pH 5.0.



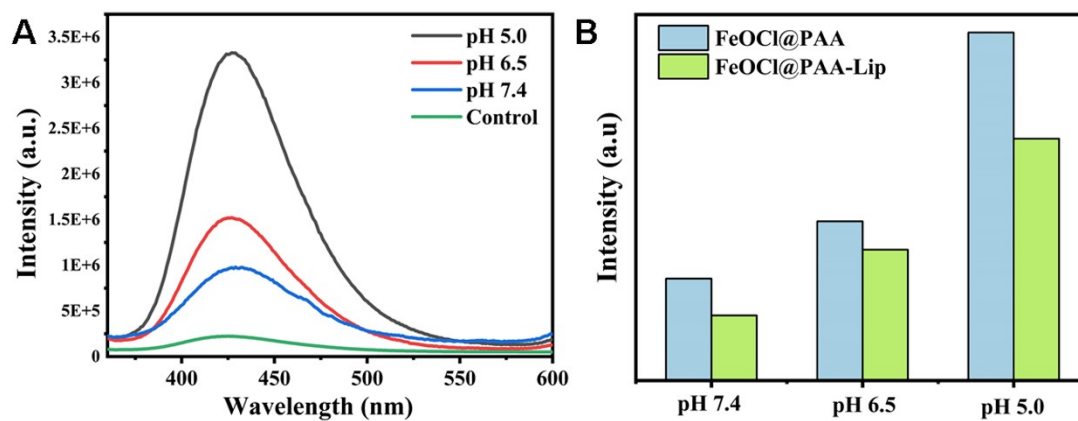

**Fig. S8** (A) The TA fluorogram of FeOCl@PAA in different pH conditions. (B) Comparison of TA fluorescence values at 426 nm between FeOCl@PAA and FeOCl@PAA-Lip under different pH conditions.

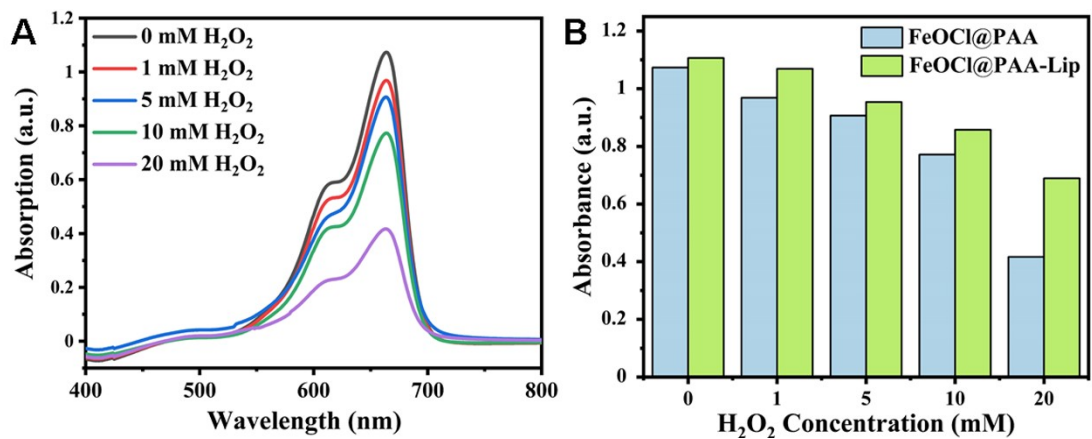

**Fig. S9** (A) The degradation curve of MB after treatment with FeOCl@PAA in different concentration of H<sub>2</sub>O<sub>2</sub>. (B) Comparison of MB absorbance value between FeOCl@PAA and FeOCl@PAA-Lip at 660 nm in different concentration of H<sub>2</sub>O<sub>2</sub>.

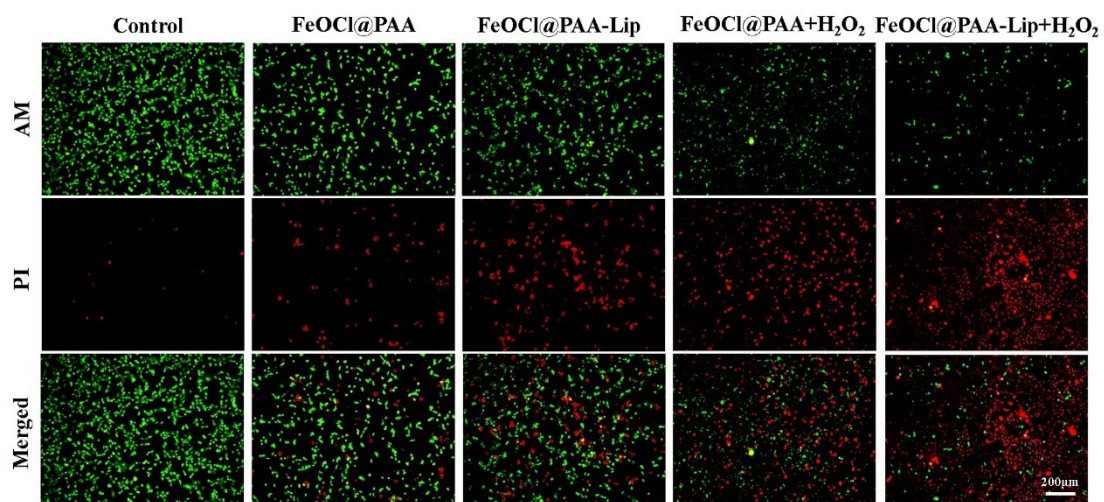

**Fig. S10** Calcein-AM/PI staining of 4T1 cells treated with FeOCl@PAA, FeOCl@PAA-Lip, FeOCl@PAA+H<sub>2</sub>O<sub>2</sub> and FeOCl@PAA-Lip+H<sub>2</sub>O<sub>2</sub>.

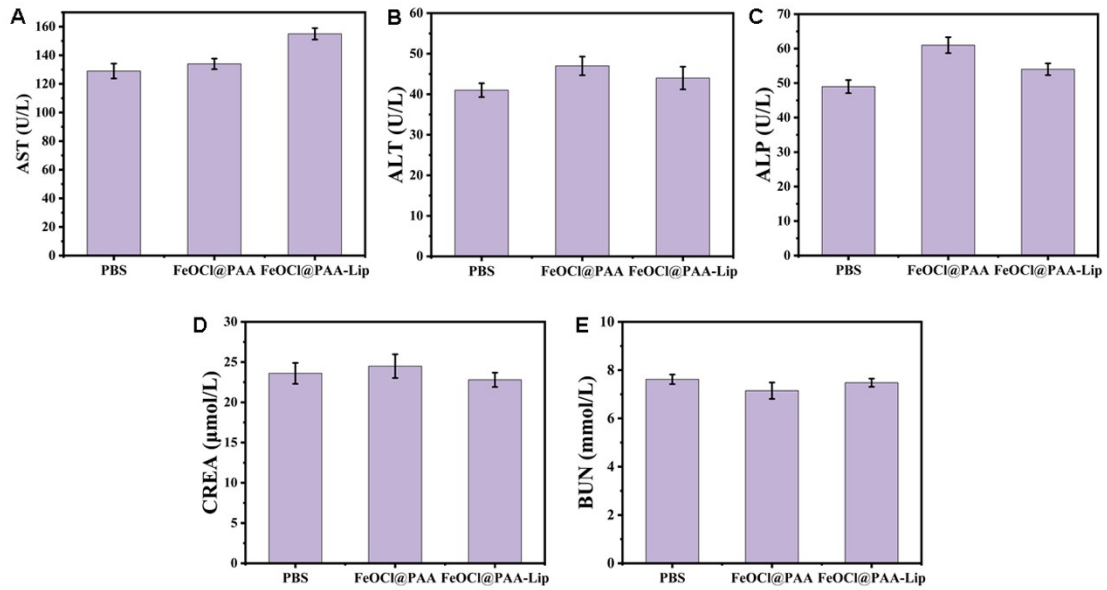

**Fig. S11** Blood biochemical indexes aspartate aminotransferase (AST), (alanine aminotransferase (ALT), alkaline phosphatase (ALP), creatinine (CREA) and urea nitrogen (BUN) indicators) of mice treated with PBS, FeOCl@PAA and FeOCl@PAA-Lip after 7 days.

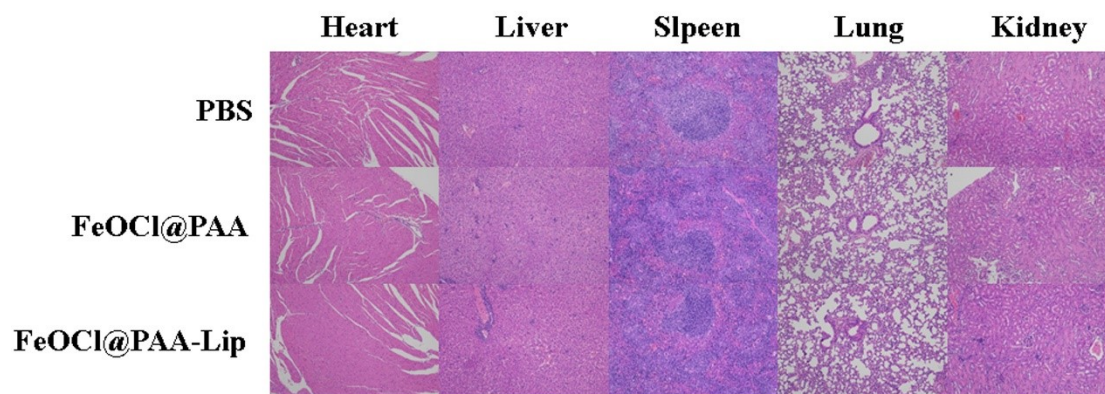

**Fig. S12** H&E-stained images of the major organs of mice treated with PBS, FeOCl@PAA and FeOCl@PAA-Lip after 14 days.

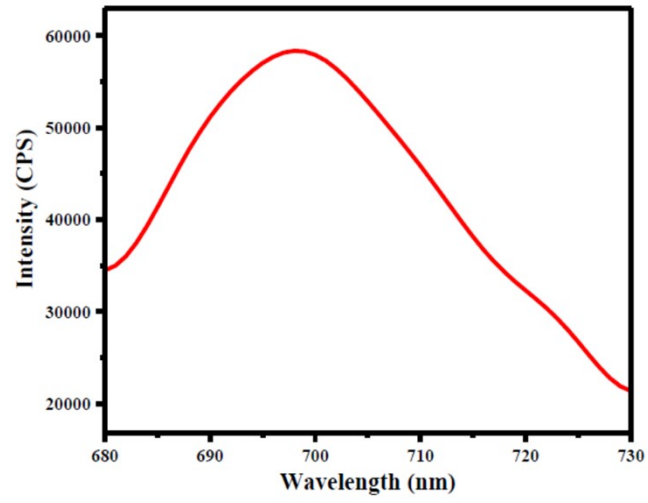

**Fig. S13** Fluorescence spectrum of Cy 5.5/FeOCl@PAA-Lip at excitation of 650 nm.
